# Supplementary material for: SHP2 associates with nuclear localization of STAT3: significance in progression and prognosis of colorectal cancer
Source: PubMed Central journal article supplement (PMC5730547; doi:10.1038/s41598-017-17604-7), 2017-12-14
Supplement: 41598_2017_17604_MOESM1_ESM.pdf [file 41598_2017_17604_MOESM1_ESM.pdf]

## Supplementary Information

### **SHP2 associates with nuclear localization of STAT3: significance in progression and prognosis of colorectal cancer**

Yan Huang<sup>1#</sup>, Jie Wang<sup>1#</sup>, Fuao Cao<sup>2#</sup>, Hailong Jiang<sup>1</sup>, An Li<sup>1</sup>, Jianzhong Li<sup>1</sup>, Lei Qiu<sup>1</sup>, Hao Shen<sup>3</sup>, Wenjun Chang<sup>3</sup>, Chuanxiang Zhou<sup>4\*</sup>, Yamin Pan<sup>5\*</sup>, Yiming Lu<sup>1\*</sup>

1 Department of Biochemical Pharmacy, School of Pharmacy, Second Military Medical University, Shanghai 200433, China

2 Department of colorectal surgery, Changhai Hospital, Second Military Medical University, Shanghai 200433, China

3 Department of Environmental Hygiene, Second Military Medical University, Shanghai 200433, China

4 Department of Oral Pathology, Peking University School and Hospital of Stomatology, Beijing 100081, China

5 Department of Endoscopy, Shuguang Hospital, Shanghai University of Traditional Chinese Medicine. 201203, China.

# Co-first author

\* Correspondence and requests should be addressed to Prof. Chuanxiang Zhou, Prof. Yamin Pan and Prof. Yiming Lu; Tel. /fax: +86 1082195221 (C. Zhou); +86 2120256691 (Y. Pan) and +86 2181871333 (Y. Lu); E-mail: zhoucx2008@126.com (C. Zhou), Panyamin2014@163.com (Y. Pan) and E-mail: bluesluyi@sina.com (Y. Lu).

**Supplementary Figure 1-5**

**Supplementary Table 1-4**

A

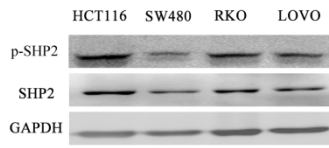

B

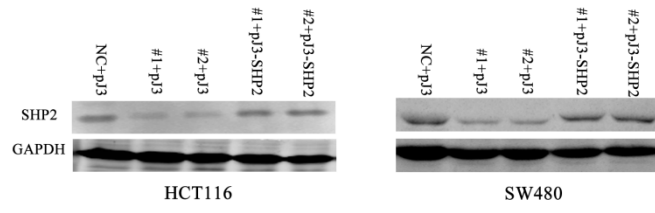

**Fig. S1** (A) Expressions of SHP2 and p-SHP2 in CRC cells. (B) SHP2 overexpression rescued siRNA (#1 and #2) mediated SHP2 knockdown in HCT116 and SW480 cells.

A

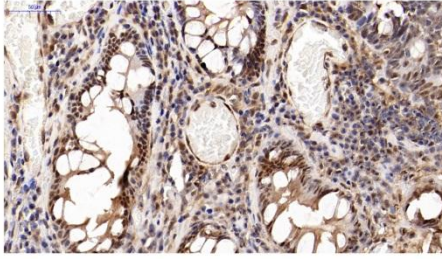

SHP2 high expression  
(IHC score = 12)

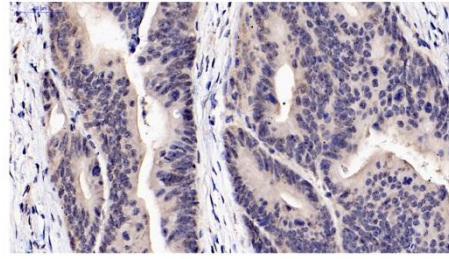

low nuclear STAT3  
(IHC score = 0)

B

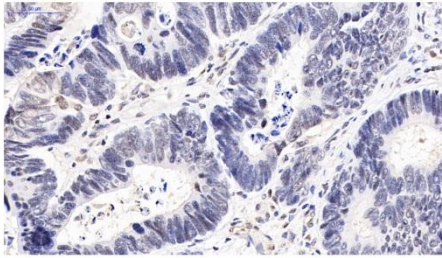

SHP2 low expression  
(IHC score = 0)

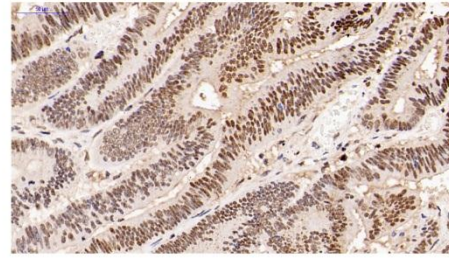

high nuclear STAT3  
(IHC score = 12)

**Fig. S2** SHP2 expression and STAT3 localization were analyzed by IHC ( $\times 200$ ). (A) High levels of cytoplasmic SHP2 and low levels of nuclear STAT3 from the same site on the same patient. (B) Low levels of SHP2 and high levels of nuclear STAT3 from the same site on the same patient.

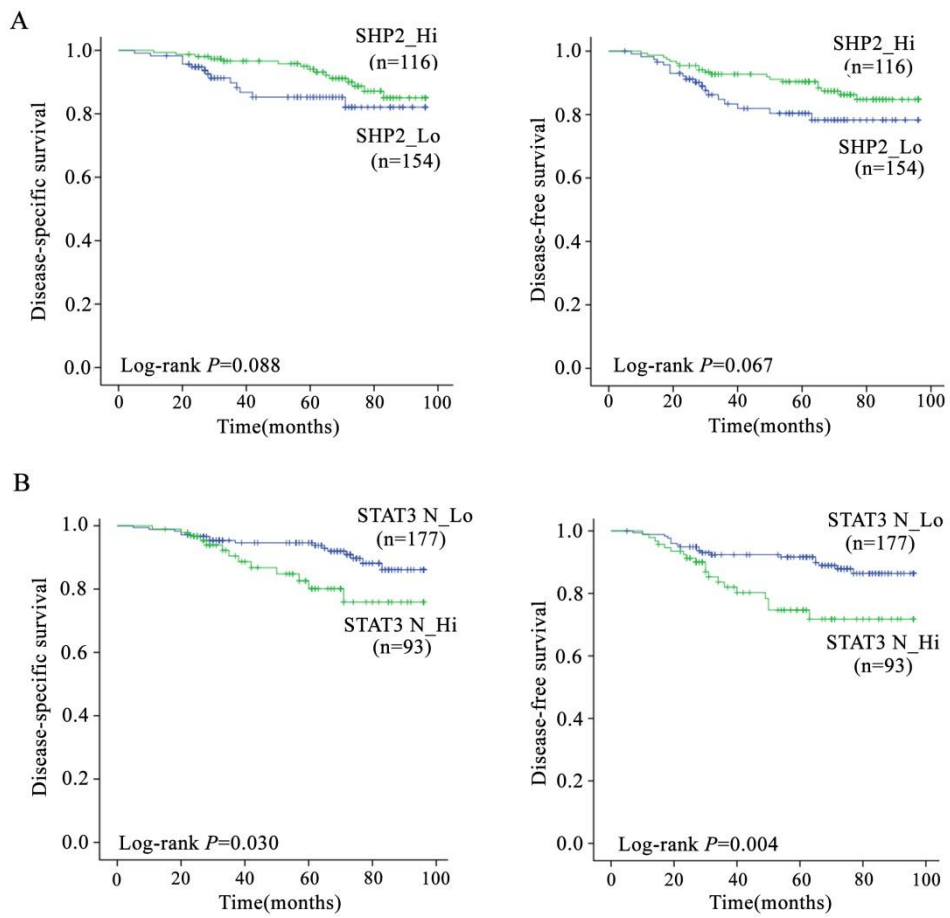

**Fig. S3 Association between SHP2 or nuclear STAT3 and survival in patients with CRC.** Kaplan-Meier analysis showed the levels of SHP2 could not be used to dichotomize 270 patients with CRC into different groups with distinct survival outcomes (A). Patients with low nuclear STAT3 present better DFS but not DSS than patients with high nuclear STAT3 (B).



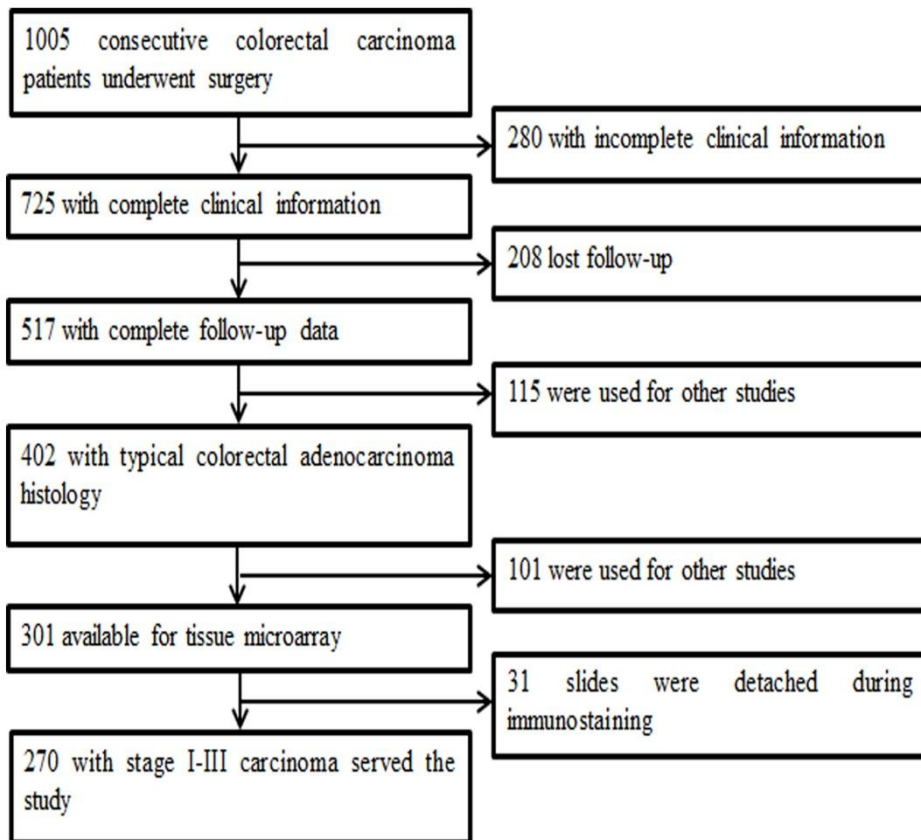

**Fig. S4 Flow diagram and selection criteria of study patients in this cohort.**

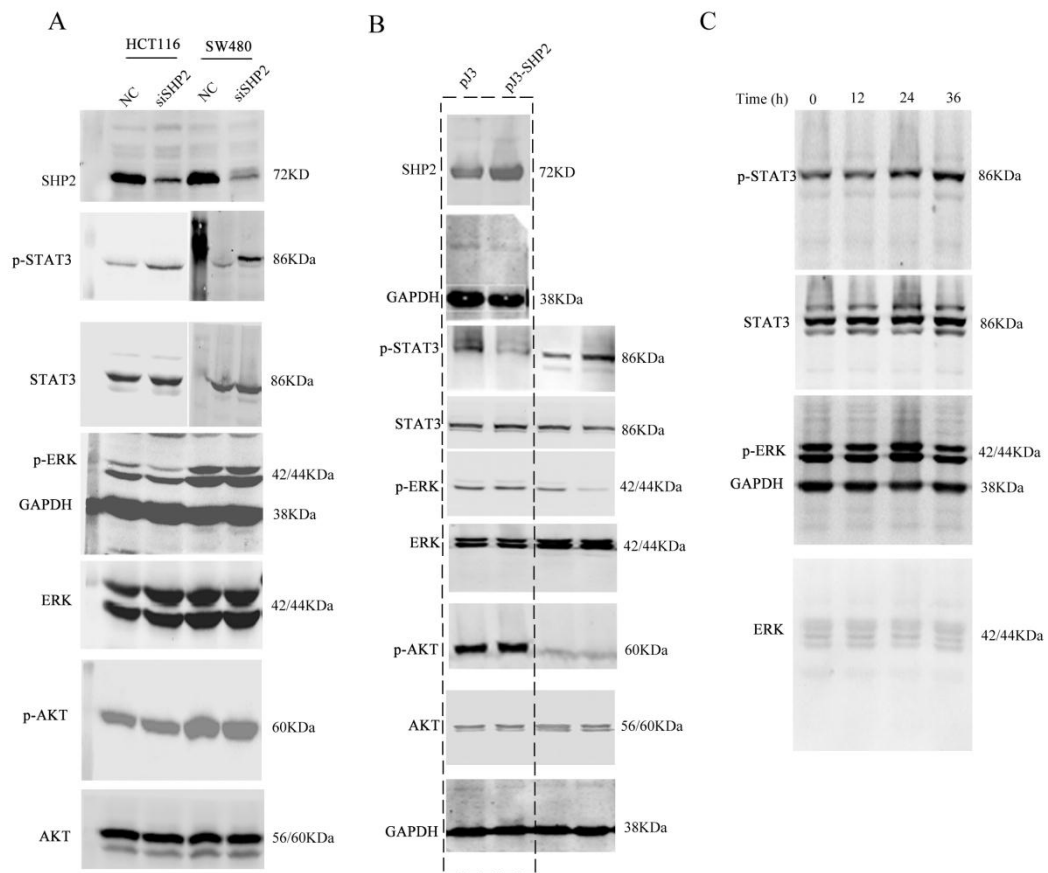

1  
1

**Fig. S5 Uncropped scans of western blot displayed in Fig. 2A, B, and C.**

Table S1 Clinical parameters of CRC patients and the association with the combinations of cytoplasmic SHP2 and nuclear STAT3

|                                  | No. of cases | SHP2_Hi and<br>STAT3_Lo | SHP2_Lo or<br>STAT3_Hi | <i>P</i> -value | SHP2_Lo and<br>STAT3_Hi | SHP2_Hi or<br>STAT3_Lo | <i>P</i> -value |
|----------------------------------|--------------|-------------------------|------------------------|-----------------|-------------------------|------------------------|-----------------|
| Total                            | 270          | 126                     | 144                    |                 | 65                      | 205                    |                 |
| Age (years)                      | 270          |                         |                        | 0.475           |                         |                        | 0.296           |
| Mean (SD)                        |              | 61.24 (11.98)           | 62.30 (12.32)          |                 | 61.55 (12.87)           | 61.89 (11.95)          |                 |
| Sex (n (%))                      |              |                         |                        | 0.511           |                         |                        | 0.44            |
| Women                            | 115 (42.6)   | 51 (40.5)               | 64 (44.4)              |                 | 25 (38.5)               | 90 (43.9)              |                 |
| Men                              | 155 (57.4)   | 75(59.5)                | 80 (55.56)             |                 | 40 (61.4)               | 115 (56.1)             |                 |
| Disease location<br>(n (%))      |              |                         |                        | 0.172           |                         |                        | 0.888           |
| Colon                            | 164 (60.7)   | 82 (65.1)               | 82 (56.9)              |                 | 39 (60.0)               | 125 (61.0)             |                 |
| Rectum                           | 106 (39.3)   | 44 (34.9)               | 62 (43.1)              |                 | 26 (40.0)               | 80 (39.0)              |                 |
| TNM stage (n (%))                |              |                         |                        | 0.83            |                         |                        | 0.16            |
| I                                | 2 (0.7)      | 0 (0)                   | 2 (1.4)                |                 | 1 (1.5)                 | 1 (0.5)                |                 |
| II                               | 177 (65.6)   | 85 (67.4)               | 92 (63.9)              |                 | 37 (56.9)               | 140 (68.3)             |                 |
| III                              | 91 (33.7)    | 41 (32.6)               | 50 (34.7)              |                 | 27 (41.6)               | 64 (31.2)              |                 |
| T stage (n (%))                  |              |                         |                        | 0.148           |                         |                        | 0.647           |
| T1                               | 2(0.7)       | 0(0)                    | 2(1.4)                 |                 | 1(1.5)                  | 1(0.5)                 |                 |
| T2                               | 107(39.6)    | 71(56.3)                | 36(25.0)               |                 | 17(26.2)                | 90(43.9)               |                 |
| T3                               | 91(33.7)     | 9(7.1)                  | 82(56.9)               |                 | 37(56.9)                | 54(26.3)               |                 |
| T4                               | 70(25.9)     | 46(36.5)                | 24(16.7)               |                 | 10(15.4)                | 60(29.3)               |                 |
| N stage (n (%))                  |              |                         |                        | 0.427           |                         |                        | 0.738           |
| N0                               | 113(41.8)    | 63(50.0)                | 50(34.7)               |                 | 26(40.0)                | 87(42.4)               |                 |
| N1                               | 124(45.9)    | 38(30.2)                | 86(59.7)               |                 | 35(53.8)                | 89(43.4)               |                 |
| N2                               | 33(12.2)     | 25(19.8)                | 8(5.56)                |                 | 4(6.2)                  | 29(14.1)               |                 |
| Differentiation grade<br>(n (%)) |              |                         |                        | 0.746           |                         |                        | 0.776           |
| Well                             | 17 (6.3)     | 7 (5.1)                 | 10 (7.5)               |                 | 4 (6.2)                 | 13 (6.3)               |                 |
| Moderately                       | 235 (87.1)   | 125 (91.9)              | 110 (82.1)             |                 | 52 (80.0)               | 183 (89.3)             |                 |

|                                  |            |                     |                     |                     |                     |
|----------------------------------|------------|---------------------|---------------------|---------------------|---------------------|
| Poorly                           | 6 (2.2)    | 2 (1.5)             | 4 (3.0)             | 1 (1.5)             | 5 (2.4)             |
| Missing                          | 12 (4.4)   | 2 (1.5)             | 10 (7.4)            | 8 (12.3)            | 4 (2.0)             |
| Adjuvant chemotherapy<br>(n (%)) |            |                     |                     | 0.968               | 0.342               |
| Yes                              | 214 (79.3) | 100 (79.4)          | 114 (79.1)          | 54 (83.1)           | 159 (77.6)          |
| No                               | 56 (20.7)  | 26 (20.6)           | 30 (20.9)           | 11 (16.9)           | 46 (22.4)           |
| Serum CEA (ng/mL)                |            |                     |                     | 0.366               | 0.401               |
| Median (rang)                    |            | 3.52<br>(0-49.53)   | 3.83<br>(0-223.10)  | 4.08<br>(0-223.1)   | 3.61<br>(0-96.51)   |
| Serum CA19-9 (U/mL)              | 264        |                     |                     | 0.312               | 0.266               |
| Median (rang)                    |            | 13.30<br>(0-141.70) | 11.69<br>(0-1000.0) | 11.33<br>(0-1000.0) | 12.49<br>(0-190.60) |
| Missing                          | 6          |                     |                     |                     |                     |

Table S2.Cox regression analysis of DSS and DFS for clinical parameters, SHP2 and nuclear STAT3 expressions.

| Variables                                 | DSS                                  |                 |                                      |                 | DFS                                  |                 |                                      |                 |
|-------------------------------------------|--------------------------------------|-----------------|--------------------------------------|-----------------|--------------------------------------|-----------------|--------------------------------------|-----------------|
|                                           | Univariate analysis                  |                 | Multivariate analysis                |                 | Univariate analysis                  |                 | Multivariate analysis                |                 |
|                                           | HR<br>(95% CI)                       | <i>P</i> -value | HR<br>(95% CI)                       | <i>P</i> -value | HR<br>(95% CI)                       | <i>P</i> -value | HR<br>(95% CI)                       | <i>P</i> -value |
| Nuclear STAT3 level(STAT3_Hi vs STAT3_Lo) | <b>2.139</b><br><b>(1.019-4.490)</b> | <b>0.044</b>    | 1.426<br>(0.611-3.330)               | 0.412           | <b>2.402</b><br><b>(1.263-4.566)</b> | <b>0.008</b>    | 1.733<br>(0.827-3.631)               | 0.145           |
| SHP2 level (SHP2_Hi vs SHP2_Lo)           | 0.519<br>(0.248-1.085)               | 0.081           | 0.518<br>(0.219-1.222)               | 0.133           | 0.541<br>(0.285-1.03)                | 0.061           | 0.605<br>(0.288-1.275)               | 0.187           |
| Age (>50 vs ≤ 50)                         | 1.388<br>(0.483-3.989)               | 0.543           | 1.306<br>(0.445-3.827)               | 0.627           | 0.713<br>(0.337-1.506)               | 0.375           | 0.692<br>(0.320-1.494)               | 0.348           |
| TNM (III vs I+II)                         | 1.551<br>(0.749-3.227)               | 0.24            | 1.433<br>(0.631-3.255)               | 0.390           | 1.62<br>(0.854-3.071)                | 0.139           | 1.379<br>(0.689-2.763)               | 0.364           |
| Sex (women vs men)                        | 1.892<br>(0.856-4.164)               | 0.113           | 0.459<br>(0.203-1.038)               | 0.062           | <b>2.282</b><br><b>(1.107-4.704)</b> | <b>0.025</b>    | <b>0.402</b><br><b>(0.191-0.849)</b> | <b>0.017</b>    |
| Disease location ( colon vsrectum)        | 1.032<br>(0.479-2.225)               | 0.936           | 0.925<br>(0.422-2.031)               | 0.846           | 0.984<br>(0.508-1.905)               | 0.961           | 0.886<br>(0.447-1.757)               | 0.729           |
| Adjuvant chemotherapy (yes vs no)         | 1.185<br>(0.452-3.109)               | 0.730           | 1.002<br>(0.346-2.901)               | 0.997           | 2.162<br>(0.767-6.093)               | 0.145           | 1.775<br>(0.599-5.261)               | 0.301           |
| Serum CEA (ng/mL) (≥5 vs<5)               | <b>2.433</b><br><b>(1.160-5.101)</b> | <b>0.019</b>    | <b>2.186</b><br><b>(1.000-4.777)</b> | <b>0.050</b>    | 1.841<br>(0.974-3.482)               | 0.60            | 1.859<br>(0.949-3.645)               | 0.071           |
| Serum CA19-9 (U/mL) (≥37 vs<37)           | 1.869<br>(0.797-4.384)               | 0.151           | 1.597<br>(0.643-3.967)               | 0.313           | 1.273<br>(0.560-2.894)               | 0.564           | 1.113<br>(0.461-2.684)               | 0.812           |
